# Supplementary material for: Cooperativity between hydrogen bonds and beryllium bonds in (H2O)nBeX2 (n = 1–3, X = H, F) complexes. A new perspective
Source: Royal Society of Chemistry journal article supplement (doi:10.1039/c2cp42534c), 2012-01-01
Supplement: c2cp42534c.pdf [file c2cp42534c.pdf]

**Cooperativity between hydrogen bonds and beryllium bonds in  $(\text{H}_2\text{O})_n\text{BeX}_2$  ( $n = 1-3$ ,  $X = \text{H}, \text{F}$ ) complexes. A new perspective.**

Laura Albrecht, Russell J. Boyd\*, Otilia Mó and Manuel Yáñez\*

*Contribution from the Department of Chemistry, Dalhousie University, Halifax, Nova Scotia, Canada B3H 4R2 and the Departamento de Química, Facultad de Ciencias, Módulo 13, Universidad Autónoma de Madrid, Campus de Excelencia UAM-CSIC, Cantoblanco, 28049 Madrid (Spain)*

**Supporting Information**

**(A total of 16 pages)**

**Table S1.** CCSD(T)/aug-cc-pVTQZ//CCSD/6-31+g(d,p) total energies (E, hartrees) and relative free energies ( $\Delta G$ , kJ mol<sup>-1</sup>) for **WD(BeH<sub>2</sub>)a** and **WD(BeH<sub>2</sub>)b** clusters.

| Cluster                     | E            | $\Delta G$ |
|-----------------------------|--------------|------------|
| <b>WD(BeH<sub>2</sub>)a</b> | -168.6327986 | 0.0        |
| <b>WD(BeH<sub>2</sub>)b</b> | -168.6309422 | 5.6        |

**Table S2.** B3LYP/6-31+G(d,p) optimized geometries for the water dimer and trimer, and the (H<sub>2</sub>O)<sub>n</sub> BeX<sub>2</sub> (n=1-3, X = H, F) complexes. Coordinates are in Å

|                                                                                                                                                                                                                                                                                                                                              |                                                                                                                                                                                                                                                                                                                                               |
|----------------------------------------------------------------------------------------------------------------------------------------------------------------------------------------------------------------------------------------------------------------------------------------------------------------------------------------------|-----------------------------------------------------------------------------------------------------------------------------------------------------------------------------------------------------------------------------------------------------------------------------------------------------------------------------------------------|
| <b>(H<sub>2</sub>O)<sub>2</sub></b><br>8 0.007035 -0.004858 -0.097332<br>1 0.051539 -0.001213 0.871549<br>1 0.921804 0.004924 -0.391940<br>8 -0.036388 -0.000158 2.801888<br>1 -0.480854 0.761251 3.188979<br>1 -0.463204 -0.772899 3.186401                                                                                                 | <b>(H<sub>2</sub>O)<sub>3</sub></b><br>8 -0.101541 0.040752 -0.188709<br>8 -0.104155 0.112758 2.597583<br>8 2.297625 -0.086707 1.210611<br>1 -0.459409 0.144352 0.712880<br>1 0.855712 0.037268 2.435930<br>1 1.678129 -0.061769 0.456557<br>1 2.863824 -0.851074 1.071128<br>1 -0.216065 0.760200 3.298802<br>1 -0.521876 0.713425 -0.731370 |
| <b>H<sub>2</sub>O:BeH<sub>2</sub></b><br>8 -0.005288 -0.086058 0.031365<br>1 0.090649 0.043361 0.981203<br>1 0.831224 0.032487 -0.431610<br>4 -1.461878 -0.468328 -0.729727<br>1 -2.416897 -0.554075 0.227869<br>1 -1.217990 -0.569053 -2.058924                                                                                             | <b>H<sub>2</sub>O:BeF<sub>2</sub></b><br>8 0.006243 -0.109381 0.039354<br>1 0.097696 0.050165 0.984616<br>1 0.828029 0.051275 -0.436231<br>4 -1.430742 -0.626080 -0.699025<br>9 -2.428713 -0.762837 0.313671<br>9 -1.189281 -0.761918 -2.100199                                                                                               |
| <b>WD(BeH<sub>2</sub>)a</b><br>8 0.231893 -0.355351 0.065392<br>1 0.432347 -0.257056 1.032568<br>1 0.878889 -0.869867 -0.425130<br>8 -0.176819 0.133774 2.562190<br>1 0.071117 0.878418 3.118954<br>1 -1.031620 0.365476 2.137819<br>4 -1.310974 -0.039255 -0.407613<br>1 -1.970435 0.480978 0.690091<br>1 -1.574879 -0.353119 -1.694842     | <b>WD(BeF<sub>2</sub>)a</b><br>8 -0.010017 0.034757 -0.004271<br>1 -0.046112 0.009449 0.991300<br>1 0.877659 -0.015587 -0.368897<br>8 -0.883847 -0.272349 2.404471<br>1 -1.076897 0.353437 3.108835<br>1 -1.720902 -0.444878 1.929394<br>4 -1.386141 -0.441314 -0.782538<br>9 -2.428108 -0.585736 0.231617<br>9 -1.249944 -0.614030 -2.190441 |
| <b>WD(BeH<sub>2</sub>)b</b><br>8 0.304537 -0.040250 -0.037072<br>1 0.170000 -0.165803 0.909899<br>1 1.078731 0.522567 -0.157365<br>4 -1.126013 0.800783 -0.711415<br>1 -2.075746 0.721716 0.298837<br>1 -0.590441 1.849569 -1.447553<br>8 -1.703397 -0.356897 -1.950329<br>1 -1.704272 0.084302 -2.808197<br>1 -2.611625 -0.605349 -1.740576 | <b>WD(BeF<sub>2</sub>)b</b><br>8 0.017861 -0.006769 0.012679<br>1 0.015296 0.012662 0.978246<br>1 0.935105 0.014565 -0.288829<br>4 -0.801538 1.459704 -0.580612<br>8 -2.163994 0.881044 -1.569202<br>1 -2.064318 1.231212 -2.463671<br>1 -2.983005 1.230609 -1.195441<br>9 0.142248 2.005527 -1.572662<br>9 -1.453064 2.003772 0.624599       |

|                             |           |           |           |                             |           |           |           |
|-----------------------------|-----------|-----------|-----------|-----------------------------|-----------|-----------|-----------|
| <b>WT(BeH<sub>2</sub>)a</b> |           |           |           | <b>WT(BeF<sub>2</sub>)a</b> |           |           |           |
| 8                           | -0.827683 | 0.083689  | 0.074616  | 8                           | -0.028250 | 0.027247  | -0.030927 |
| 8                           | 0.287437  | 0.887919  | 2.262396  | 8                           | 0.072458  | 0.028553  | 2.532292  |
| 8                           | 2.199576  | -0.877434 | 1.695828  | 8                           | 2.699190  | -0.401141 | 2.545822  |
| 1                           | -0.462637 | 0.444054  | 0.943649  | 1                           | -0.072476 | 0.025687  | 0.982083  |
| 1                           | 1.092861  | 0.316417  | 2.258671  | 1                           | 1.042671  | -0.081777 | 2.706743  |
| 1                           | 1.704271  | -1.366450 | 0.996093  | 1                           | 2.810317  | -0.486046 | 1.575322  |
| 1                           | 2.852349  | -1.477902 | 2.065362  | 1                           | 3.419055  | 0.150782  | 2.863962  |
| 1                           | -0.136975 | 0.765965  | 3.117031  | 1                           | -0.381606 | -0.635957 | 3.059658  |
| 1                           | -1.429185 | 0.701403  | -0.350782 | 1                           | -0.839691 | 0.341338  | -0.439828 |
| 4                           | -0.289252 | -1.218040 | -0.739715 | 4                           | 1.308890  | -0.195358 | -0.933229 |
| 1                           | 0.677684  | -1.897025 | -0.031915 | 9                           | 2.475327  | -0.505945 | -0.107312 |
| 1                           | -0.891914 | -1.379670 | -1.941900 | 9                           | 1.085779  | -0.028414 | -2.335528 |
| <b>WT(BeH<sub>2</sub>)b</b> |           |           |           | <b>WT(BeF<sub>2</sub>)b</b> |           |           |           |
| 8                           | 0.283775  | 0.054532  | 0.308774  | 8                           | 0.021612  | 0.034822  | 0.033028  |
| 1                           | 0.107100  | 0.108950  | 1.272917  | 1                           | -0.058286 | -0.114557 | 1.001832  |
| 1                           | 1.176398  | 0.297623  | -0.019611 | 1                           | 0.894945  | -0.114750 | -0.395060 |
| 8                           | -1.167379 | -0.276968 | 2.458295  | 8                           | -1.179101 | 0.041413  | 2.359225  |
| 1                           | -1.670910 | 0.294853  | 3.045302  | 1                           | -1.109237 | 0.471667  | 3.215979  |
| 1                           | -1.764328 | -0.523872 | 1.723960  | 1                           | -1.837810 | 0.539012  | 1.839335  |
| 4                           | -0.863284 | -0.429113 | -0.710910 | 4                           | -1.084826 | 0.933459  | -0.724780 |
| 1                           | -2.032304 | -0.733909 | -0.055011 | 8                           | 1.835702  | 0.211935  | -1.847792 |
| 1                           | -0.420297 | -0.430796 | -2.012225 | 1                           | 1.095799  | 0.663529  | -2.295747 |
| 8                           | 2.062638  | 0.515757  | -1.551315 | 1                           | 2.226300  | -0.392317 | -2.485442 |
| 1                           | 1.282838  | 0.184650  | -2.040023 | 9                           | -0.680538 | 1.262990  | -2        |
| 1                           | 2.828460  | 0.052713  | -1.903750 | 9                           | -2.221351 | 1.237377  | 0.129047  |
| <b>WT(BeH<sub>2</sub>)c</b> |           |           |           | <b>WT(BeF<sub>2</sub>)c</b> |           |           |           |
| 8                           | 0.159874  | -0.449575 | 0.121021  | 8                           | -0.016461 | 0.013474  | 0.018584  |
| 1                           | 0.076286  | -0.157034 | 1.061387  | 1                           | -0.010186 | 0.044088  | 1.009334  |
| 1                           | 0.692270  | 0.185488  | -0.368030 | 1                           | 0.888184  | 0.031171  | -0.312244 |
| 8                           | -0.919111 | 0.035527  | 2.478394  | 8                           | -0.615930 | 0.581222  | 2.528472  |
| 1                           | -1.151170 | 0.850253  | 2.934092  | 1                           | -0.151209 | 1.036058  | 3.236433  |
| 1                           | -1.669413 | -0.174614 | 1.867314  | 1                           | -1.158324 | 1.251088  | 2.059041  |
| 4                           | -1.406948 | -0.675919 | -0.581906 | 4                           | -0.947961 | 1.304548  | -0.635112 |
| 1                           | -2.333360 | -0.599734 | 0.489155  | 8                           | -2.268733 | 0.555991  | -1.579772 |
| 1                           | -1.446556 | -0.031491 | -1.806540 | 1                           | -3.118613 | 0.844953  | -1.224240 |
| 8                           | -1.429830 | -2.421233 | -1.006456 | 1                           | -2.188359 | 0.901825  | -2.478376 |
| 1                           | -2.121690 | -2.885423 | -0.520600 | 9                           | -1.695164 | 1.909980  | 0.528584  |
| 1                           | -1.638583 | -2.479684 | -1.946537 | 9                           | -0.135357 | 1.960595  | -1.674566 |
| <b>WT(BeF<sub>2</sub>)d</b> |           |           |           | <b>WT(BeF<sub>2</sub>)d</b> |           |           |           |
| 8                           | 0.012415  | -0.122697 | 0.049398  | 8                           | -0.020480 | 0.104705  | 0.008291  |
| 1                           | -0.092572 | -0.168611 | 1.048406  | 1                           | -0.081595 | 0.055967  | 1.026376  |
| 1                           | 0.904144  | -0.286281 | -0.268392 | 1                           | 0.869150  | -0.008011 | -0.344076 |
| 8                           | -0.957059 | -0.332416 | 2.391789  | 8                           | -0.734289 | -0.226274 | 2.401041  |
| 1                           | -1.072113 | 0.397652  | 3.026301  | 1                           | -0.912178 | 0.503055  | 3.027897  |
| 1                           | -1.785612 | -0.397808 | 1.883284  | 1                           | -1.589775 | -0.506165 | 2.020181  |
| 4                           | -1.357415 | -0.334551 | -0.823198 | 4                           | -1.336934 | -0.549844 | -0.725830 |
| 1                           | -2.415549 | -0.320963 | 0.064688  | 8                           | -1.240832 | 1.853233  | 4.214542  |
| 1                           | -1.157889 | -0.480706 | -2.155757 | 1                           | -1.855019 | 2.572044  | 4.018121  |
| 8                           | -1.310468 | 1.770723  | 4.249033  | 1                           | -1.337395 | 1.655869  | 5.154800  |
| 1                           | -1.699249 | 2.620257  | 4.016735  | 9                           | -2.388749 | -0.729809 | 0.273745  |
| 1                           | -1.575835 | 1.592357  | 5.157053  | 9                           | -1.200535 | -0.837213 | -2.121250 |

**Table S3.** B3LYP/6-311+G(3df,2p)//B3LYP/6-31+G(d,p) total energies (hartrees)

|                                   |              |
|-----------------------------------|--------------|
| water                             | -76.463373   |
| water dimer                       | -152.934352  |
| water trimer                      | -229.41373   |
| BeH <sub>2</sub>                  | -15.9234856  |
| BeF <sub>2</sub>                  | -214.689368  |
| H <sub>2</sub> O:BeH <sub>2</sub> | -92.4161175  |
| H <sub>2</sub> O:BeF <sub>2</sub> | -291.1860227 |
| <b>WD(BeH<sub>2</sub>)a</b>       | -168.9017818 |
| <b>WD(BeH<sub>2</sub>)b</b>       | -168.896473  |
| <b>WD(BeF<sub>2</sub>)a</b>       | -367.674095  |
| <b>WD(BeF<sub>2</sub>)b</b>       | -367.6694464 |
| <b>WT(BeH<sub>2</sub>)a</b>       | -245.3850267 |
| <b>WT(BeH<sub>2</sub>)b</b>       | -245.3837711 |
| <b>WT(BeH<sub>2</sub>)c</b>       | -245.3815168 |
| <b>WT(BeH<sub>2</sub>)d</b>       | -245.3753606 |
| <b>WT(BeF<sub>2</sub>)a</b>       | -444.1586208 |
| <b>WT(BeF<sub>2</sub>)b</b>       | -444.158092  |
| <b>WT(BeF<sub>2</sub>)c</b>       | -444.1559868 |
| <b>WT(BeF<sub>2</sub>)d</b>       | -444.1479908 |

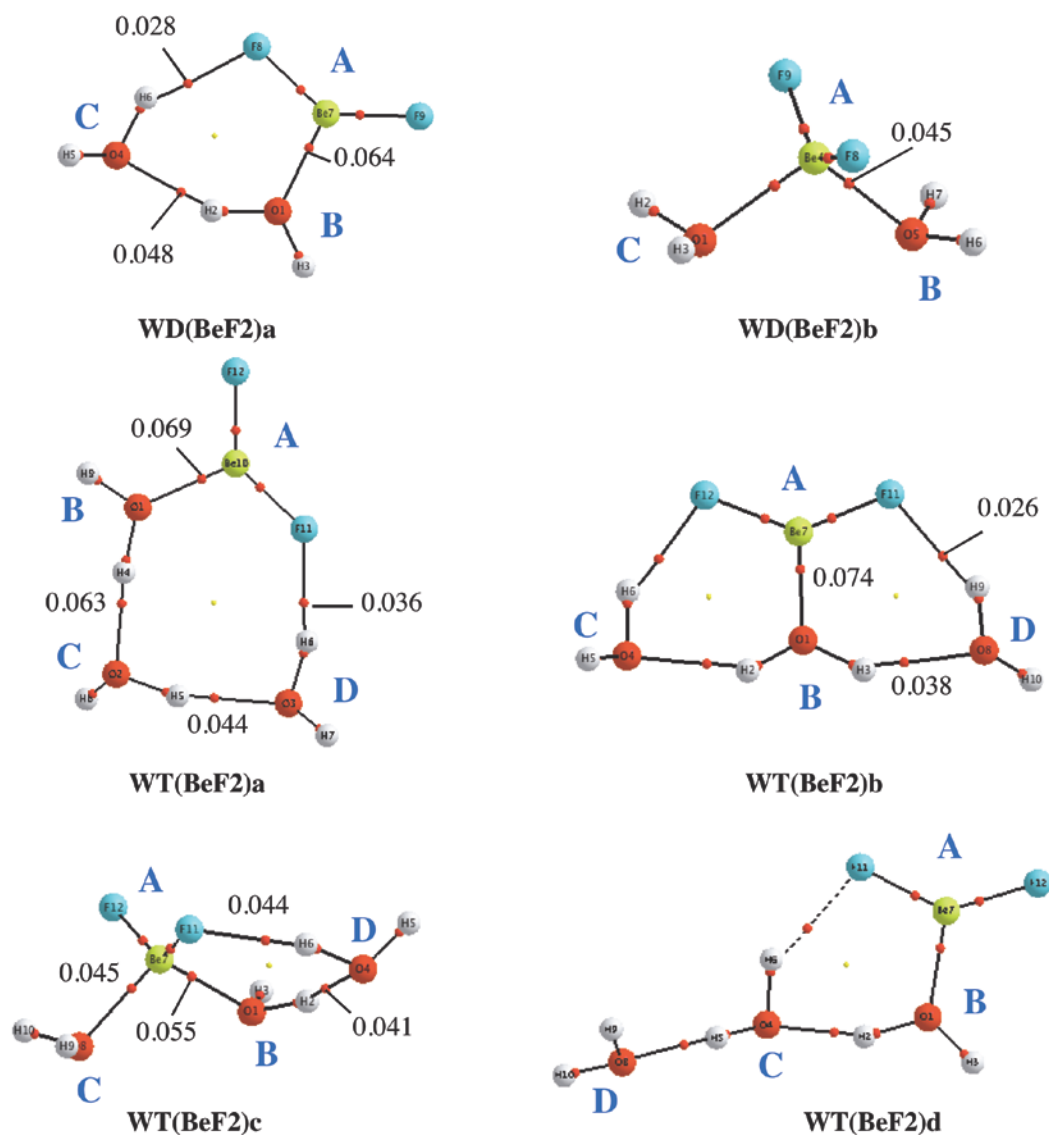

**Figure S1.** Molecular graphs of the optimized clusters formed by two and three water molecules with  $\text{BeF}_2$ . Red dots denote BCPs. Electron densities are in a.u.. **A** and **B** denote respectively the  $\text{BeH}_2$  molecule and the water molecule attached to through a beryllium bond.

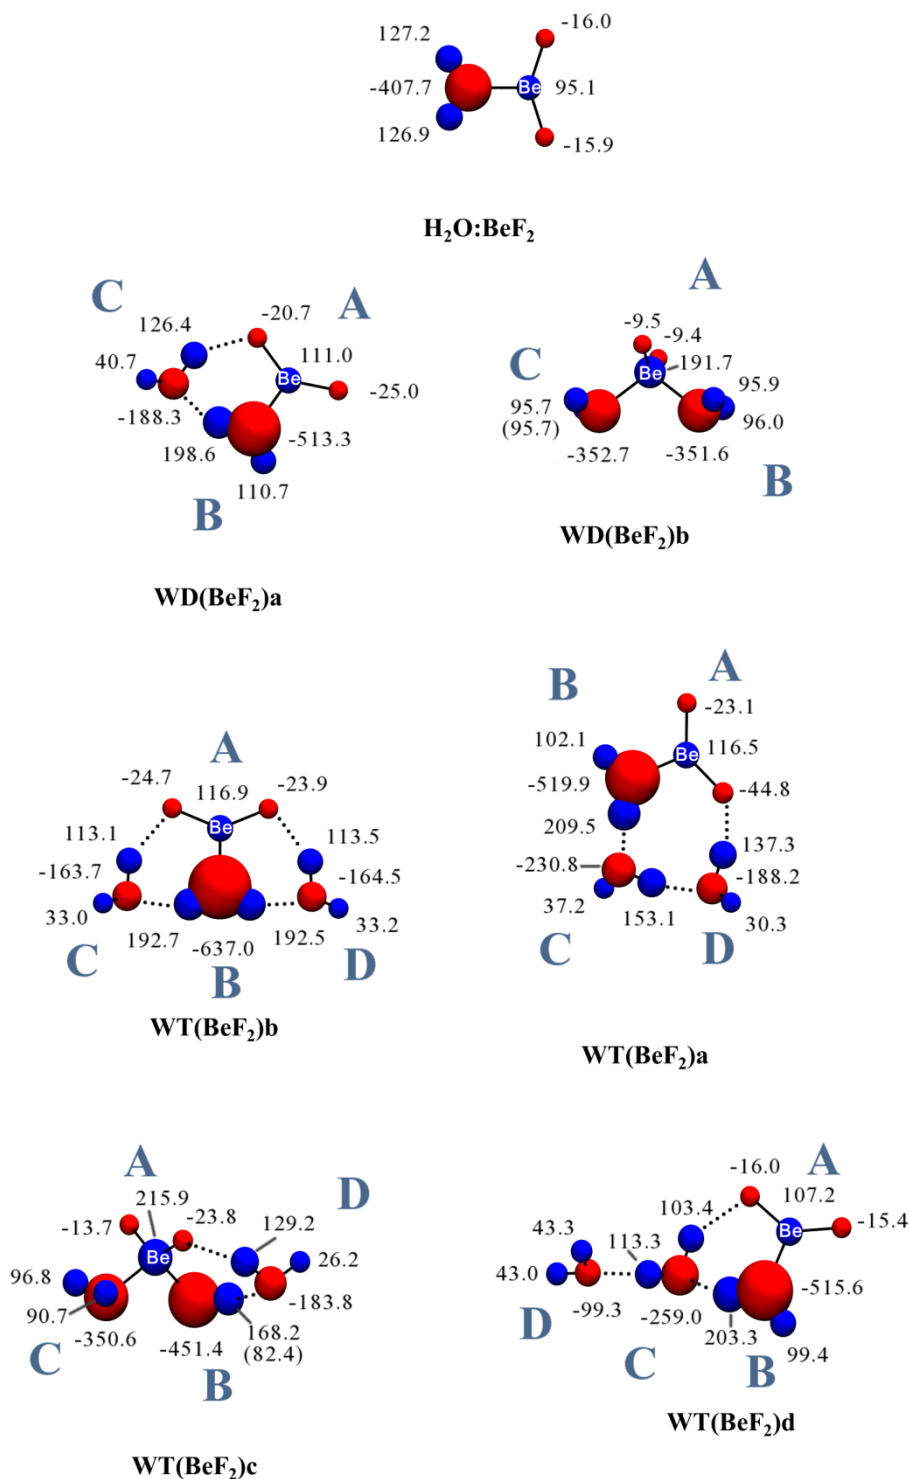

**Figure S2.** Change in atomic energy for the formation of  $\text{BeF}_2:(\text{H}_2\text{O})_n$ ,  $n=1-3$ , systems. Values for the relative energy change of each atom are labeled ( $\text{kJ mol}^{-1}$ ). Stabilized atoms are red, destabilized atoms are blue. Atom size corresponds to the magnitude of energy change. **A**, **B**, **C**, and **D** denote labels as in Figure 1. For hydrogens which are hidden the energy is included in parentheses. The atomic energies for the atoms in  $\text{BeF}_2$  and  $\text{H}_2\text{O}$  monomers are: Be ( $-3.7 \times 10^5$ ), F ( $-2.63 \times 10^3$ ), and O ( $1.98 \times 10^5$ ), H ( $1.03 \times 10^3$ ), respectively, in  $\text{kJ mol}^{-1}$ .

**Table S4.** QTAIM Atomic energies, charges, dipole moments and Lagrangian values for the water, BeH<sub>2</sub>, and BeF<sub>2</sub> monomers, water dimer and trimer, and the (H<sub>2</sub>O)<sub>n</sub> BeX<sub>2</sub> (n =1-3, X = H, F) complexes.

Note: **AIMAll vs. 12.06.03.** Default parameters were used except for special cases where it was necessary to improve integration. Instances where L(A) is >10<sup>4</sup> have been evaluated using “Sculpt” method for maximum accuracy possible.

Definitions of Some Atomic Properties:

-----  
 $q(A)$  = Net Charge of Atom A  
 $L(A)$  = Lagrangian of Atom A = -(1/4) Times Atomic Integral of the Laplacian of the Electron Density  
 $K(A)$  = Electronic Kinetic Energy of Atom A (Hamiltonian Form)  
 $K\_Scaled(A)$  =  $K(A) * E(Mol)/K(Mol)$  = Approximation to Virial-Based Total Energy of Atom A.  
 $|Mu\_Intra(A)|$  = Magnitude of Intraatomic Dipole Moment of Atom A

Note.  $K\_Scaled(A) = (1+V(Mol)/T(Mol))*K(A) = (E(Mol)/T(Mol))*K(A)$

**H<sub>2</sub>O**

| Atom A | q(A)         | L(A)         | K(A)        | K_Scaled(A)  | Mu_Intra(A) |
|--------|--------------|--------------|-------------|--------------|-------------|
| O1     | -1.096280696 | -4.51579E-05 | 75.44435714 | -75.67260469 | 0.130715883 |
| H2     | 0.54813183   | 1.56412E-05  | 0.391741648 | -0.392926814 | 0.173629559 |
| H3     | 0.548129566  | 1.59059E-05  | 0.391741154 | -0.392926319 | 0.173628936 |
| Total  | -1.92998E-05 | -1.36108E-05 | 76.22783995 | -76.45845782 |             |

**BeH<sub>2</sub>**

| Atom A | q(A)         | L(A)         | K(A)        | K_Scaled(A)  | Mu_Intra(A) |
|--------|--------------|--------------|-------------|--------------|-------------|
| Be1    | 1.65491442   | 3.76922E-05  | 14.25869156 | -14.38688405 | 1.90628E-07 |
| H2     | -0.827441221 | -4.41243E-06 | 0.761108332 | -0.767951061 | 0.529440009 |
| H3     | -0.827440802 | -4.27755E-06 | 0.76110819  | -0.767950918 | 0.529439247 |
| Total  | 3.23976E-05  | 2.90022E-05  | 15.78090808 | -15.92278603 |             |

**BeF<sub>2</sub>**

| Atom A | q(A) | L(A) | K(A) | K_Scaled(A) | Mu_Intra(A) |
|--------|------|------|------|-------------|-------------|
|--------|------|------|------|-------------|-------------|

|       |              |              |             |              |             |
|-------|--------------|--------------|-------------|--------------|-------------|
| Be1   | 1.712506237  | 8.80365E-05  | 14.21092092 | -14.2536159  | 3.07946E-16 |
| F2    | -0.856223543 | -1.46899E-05 | 99.91037514 | -100.2105437 | 0.440669195 |
| F3    | -0.856223543 | -1.46899E-05 | 99.91037514 | -100.2105437 | 0.440669195 |
| Total | 5.91517E-05  | 5.86567E-05  | 214.0316712 | -214.6747033 |             |

**BeH<sub>2</sub>:H<sub>2</sub>O**

| Atom A | q(A)         | L(A)         | K(A)        | K_Scaled(A)  | Mu_Intra(A) |
|--------|--------------|--------------|-------------|--------------|-------------|
| O1     | -1.24534795  | -3.58671E-05 | 75.58849609 | -75.91560531 | 0.053034367 |
| H2     | 0.61914358   | 1.36964E-05  | 0.348282315 | -0.349789507 | 0.144153399 |
| H3     | 0.619138534  | 1.42365E-05  | 0.348284995 | -0.349792198 | 0.144157301 |
| Be4    | 1.642716431  | -7.31313E-05 | 14.22062468 | -14.28216443 | 0.059948557 |
| H5     | -0.817938582 | 6.71822E-07  | 0.753454918 | -0.756715494 | 0.345916976 |
| H6     | -0.81793669  | 7.26184E-07  | 0.753460728 | -0.756721329 | 0.345905297 |
| Total  | -0.000224678 | -7.96676E-05 | 92.01260373 | -92.41078827 |             |

**BeF<sub>2</sub>:H<sub>2</sub>O**

| Atom A | q(A)         | L(A)         | K(A)        | K_Scaled(A)  | Mu_Intra(A) |
|--------|--------------|--------------|-------------|--------------|-------------|
| Be1    | 1.719669985  | 1.76629E-05  | 14.17327953 | -14.21741131 | 0.005837175 |
| O2     | -1.221472658 | -4.03901E-05 | 75.59251817 | -75.82789291 | 0.099017431 |
| H3     | 0.627489776  | -6.14617E-06 | 0.343408695 | -0.344477977 | 0.139083813 |
| H4     | 0.627421297  | -3.66906E-06 | 0.343517725 | -0.344587347 | 0.139083863 |
| F5     | -0.876537179 | -6.94879E-06 | 99.90551571 | -100.2165946 | 0.32436472  |
| F6     | -0.876481851 | 1.04602E-05  | 99.90554706 | -100.216626  | 0.325516454 |



Total 8.93711E-05 -2.90311E-05 290.2637869 -291.1675902

**(H<sub>2</sub>O)<sub>2</sub>** -----

| Atom A | q(A)         | L(A)         | K(A)        | K_Scaled(A)  | Mu_Intra(A) |
|--------|--------------|--------------|-------------|--------------|-------------|
| O1     | -1.146960286 | -3.48372E-05 | 75.46068494 | -75.69470739 | 0.131064922 |
| H2     | 0.589476136  | -6.19491E-05 | 0.368472901 | -0.369615628 | 0.134217803 |
| H3     | 0.537102085  | 1.63975E-05  | 0.39791085  | -0.399144871 | 0.179143306 |
| O4     | -1.113397261 | -3.57648E-05 | 75.46576269 | -75.69980089 | 0.192872776 |
| H5     | 0.566867627  | 1.85576E-05  | 0.38028379  | -0.381463145 | 0.165286442 |
| H6     | 0.566854846  | 1.82933E-05  | 0.380288876 | -0.381468247 | 0.165289566 |
| Total  | -5.68525E-05 | -7.93028E-05 | 152.4534041 | -152.9262002 |             |

**WD(BeH<sub>2</sub>)<sub>a</sub>** -----

| Atom A | q(A)         | L(A)         | K(A)        | K_Scaled(A)  | Mu_Intra(A) |
|--------|--------------|--------------|-------------|--------------|-------------|
| O1     | -1.305027705 | -2.74227E-05 | 75.62938841 | -75.91741613 | 0.058317613 |
| H2     | 0.654589496  | 4.9594E-05   | 0.319133265 | -0.320348655 | 0.109085305 |
| H3     | 0.613402366  | 1.1946E-05   | 0.352597853 | -0.35394069  | 0.145657814 |
| O4     | -1.159583794 | -4.66958E-05 | 75.50074956 | -75.78828737 | 0.178414486 |
| H5     | 0.570125004  | 1.27622E-05  | 0.378226854 | -0.379667297 | 0.163504577 |
| H6     | 0.58599073   | 3.07089E-05  | 0.352162133 | -0.353503311 | 0.157551702 |
| Be7    | 1.641457878  | 2.07934E-05  | 14.21390584 | -14.26803822 | 0.059188543 |
| H8     | -0.784088713 | -1.14589E-05 | 0.753531505 | -0.756401261 | 0.313009309 |
| H9     | -0.816817685 | 7.05398E-07  | 0.751886341 | -0.754749833 | 0.349520331 |
| Total  | 4.75776E-05  | 4.09324E-05  | 168.2515818 | -168.8923528 |             |

**WD(BeH<sub>2</sub>)<sub>b</sub>** -----

| Atom A | q(A)         | L(A) | K(A)        | K_Scaled(A) | Mu_Intra(A)  |             |
|--------|--------------|------|-------------|-------------|--------------|-------------|
| O1     | -1.201428488 |      | 3.40188E-05 | 75.56211037 | -75.85179888 | 0.210974194 |
| H2     | 0.600371298  |      | 2.08765E-05 | 0.358839703 | -0.360215415 | 0.15426571  |
| H3     | 0.600341524  |      | 2.13421E-05 | 0.358865458 | -0.360241269 | 0.154259913 |
| Be4    | 1.641451396  |      | 1.9971E-06  | 14.18160094 | -14.23597008 | 0.047954018 |
| H5     | -0.819870162 |      | 1.15452E-05 | 0.750116072 | -0.752991852 | 0.225668834 |
| H6     | -0.819885155 |      | 1.22061E-05 | 0.750121391 | -0.752997191 | 0.225721163 |
| O7     | -1.201434331 |      | 3.93341E-05 | 75.56214637 | -75.85183502 | 0.210983416 |
| H8     | 0.600371624  |      | 2.29246E-05 | 0.358847336 | -0.360223077 | 0.154258434 |
| H9     | 0.600361328  |      | 2.22365E-05 | 0.358851226 | -0.360226983 | 0.154264731 |
| Total  | 0.000279034  |      | 0.000186481 | 168.2414989 | -168.8864998 |             |

**WD(BeF<sub>2</sub>)a**

| Atom A | q(A)         | L(A) | K(A)         | K_Scaled(A) | Mu_Intra(A)  |             |
|--------|--------------|------|--------------|-------------|--------------|-------------|
| O1     | -1.284864907 |      | -6.55954E-06 | 75.63074143 | -75.86810776 | 0.092889969 |
| H2     | 0.657620287  |      | -4.56735E-05 | 0.316282161 | -0.317274809 | 0.104625464 |
| H3     | 0.618075949  |      | 9.28571E-06  | 0.349682773 | -0.350780249 | 0.143019862 |
| O4     | -1.16260427  |      | -3.42048E-05 | 75.50733168 | -75.74431069 | 0.189518517 |
| H5     | 0.574419606  |      | 1.44523E-05  | 0.376237217 | -0.377418034 | 0.161180059 |
| H6     | 0.625302363  |      | -4.10414E-05 | 0.343723005 | -0.344801776 | 0.125897121 |
| Be7    | 1.71952978   |      | -8.46751E-05 | 14.16686881 | -14.21133138 | 0.002449283 |
| F8     | -0.871346283 |      | -3.38047E-06 | 99.9065122  | -100.2200678 | 0.268928627 |
| F9     | -0.876376335 |      | -1.02775E-05 | 99.90487708 | -100.2184275 | 0.32666981  |
| Total  | -0.00024381  |      | -0.000202074 | 366.5022564 | -367.65252   |             |

**WD(BeF<sub>2</sub>)b**

| Atom A | q(A) | L(A) | K(A) | K_Scaled(A) | Mu_Intra(A) |
|--------|------|------|------|-------------|-------------|
|--------|------|------|------|-------------|-------------|

|       |              |              |             |              |             |
|-------|--------------|--------------|-------------|--------------|-------------|
| O1    | -1.18248174  | 6.08492E-06  | 75.5679964  | -75.80651394 | 0.196091292 |
| H2    | 0.607046579  | 1.88421E-05  | 0.355363387 | -0.356485031 | 0.147917813 |
| H3    | 0.607079389  | 1.88337E-05  | 0.355344012 | -0.356465595 | 0.147907887 |
| Be4   | 1.723956282  | -0.000113766 | 14.13600164 | -14.18061953 | 0.000293909 |
| O5    | -1.182758307 | 1.89923E-05  | 75.56841027 | -75.80692911 | 0.196069929 |
| H6    | 0.607203595  | 1.84675E-05  | 0.355274366 | -0.356395729 | 0.147855963 |
| H7    | 0.607255015  | 1.84304E-05  | 0.355234846 | -0.356356084 | 0.147838315 |
| F8    | -0.893550823 | -1.67917E-05 | 99.89883127 | -100.2141449 | 0.240325985 |
| F9    | -0.893553651 | -1.64254E-05 | 99.89881607 | -100.2141297 | 0.240256058 |
| Total | 0.000196338  | -4.73323E-05 | 366.4912723 | -367.6480397 |             |

**(H<sub>2</sub>O)<sub>3</sub>**

| Atom A | q(A)         | L(A) | K(A)         | K_Scaled(A) | Mu_Intra(A)  |             |
|--------|--------------|------|--------------|-------------|--------------|-------------|
| O1     | -1.162053349 |      | -2.98449E-05 | 75.48697009 | -75.72488766 | 0.178654606 |
| O2     | -1.165703617 |      | -4.90548E-05 | 75.48673937 | -75.72465621 | 0.17507886  |
| O3     | -1.162668692 |      | -4.02691E-05 | 75.48716535 | -75.72508354 | 0.171653399 |
| H4     | 0.607301157  |      | -1.746E-05   | 0.353522556 | -0.354636778 | 0.133698177 |
| H5     | 0.606871663  |      | 2.46315E-05  | 0.353846661 | -0.354961904 | 0.132415315 |
| H6     | 0.607483198  |      | 7.00798E-05  | 0.353809546 | -0.354924672 | 0.131737551 |
| H7     | 0.556617974  |      | 1.80533E-05  | 0.386467127 | -0.387685183 | 0.169877562 |
| H8     | 0.555730942  |      | 1.6489E-05   | 0.3870697   | -0.388289655 | 0.170464957 |
| H9     | 0.556436233  |      | 1.67905E-05  | 0.386597777 | -0.387816244 | 0.170209071 |
| Total  | 1.55097E-05  |      | 9.41522E-06  | 228.6821882 | -229.4029418 |             |

**WT(BeH<sub>2</sub>)c**

| Atom A | q(A)         | L(A) | K(A)         | K_Scaled(A) | Mu_Intra(A)  |             |
|--------|--------------|------|--------------|-------------|--------------|-------------|
| O1     | -1.260680822 |      | -7.27888E-05 | 75.5981035  | -75.873174   | 0.195390422 |
| H2     | 0.638886884  |      | 5.29182E-05  | 0.330776773 | -0.331980334 | 0.116070016 |
| H3     | 0.594942348  |      | 1.97674E-05  | 0.363455828 | -0.364778295 | 0.154840215 |
| O4     | -1.168915309 |      | -2.26554E-05 | 75.49580611 | -75.77050439 | 0.169040548 |
| H5     | 0.559346473  |      | 1.32412E-05  | 0.384004497 | -0.385401732 | 0.169337437 |
| H6     | 0.577652472  |      | 1.76683E-05  | 0.353142193 | -0.354427132 | 0.1554716   |
| Be7    | 1.643532228  |      | -2.0157E-05  | 14.17291544 | -14.22448487 | 0.046748453 |
| H8     | -0.769931252 |      | 2.19703E-05  | 0.751854939 | -0.754590631 | 0.227946058 |
| H9     | -0.817097215 |      | 1.24816E-05  | 0.749951826 | -0.752680593 | 0.226444236 |
| O10    | -1.198100522 |      | -1.88342E-06 | 75.55985517 | -75.83478651 | 0.212655883 |
| H11    | 0.598287424  |      | 1.39613E-05  | 0.36065394  | -0.361966211 | 0.153757745 |
| H12    | 0.602191017  |      | 2.39067E-05  | 0.357594901 | -0.358896042 | 0.153932305 |
| Total  | 0.000113725  |      | 5.84304E-05  | 244.4781151 | -245.3676707 |             |

**WT(BeH<sub>2</sub>)b**

| Atom A | q(A)         | L(A) | K(A)         | K_Scaled(A) | Mu_Intra(A)  |             |
|--------|--------------|------|--------------|-------------|--------------|-------------|
| O1     | -1.355763591 |      | -8.75028E-06 | 75.67356109 | -75.94733744 | 0.007513901 |
| H2     | 0.653818676  |      | -5.62283E-05 | 0.321458378 | -0.32262137  | 0.115184775 |
| H3     | 0.653856778  |      | 4.54394E-06  | 0.321472122 | -0.322635163 | 0.115231558 |
| O4     | -1.157991751 |      | -2.08058E-05 | 75.4918276  | -75.76494647 | 0.177317527 |
| H5     | 0.566722554  |      | 1.39569E-05  | 0.380357393 | -0.381733473 | 0.16529717  |
| H6     | 0.583304918  |      | 3.76632E-05  | 0.356021554 | -0.35730959  | 0.159289123 |
| Be7    | 1.640123043  |      | -7.83735E-05 | 14.2105592  | -14.26197101 | 0.062468419 |
| H8     | -0.788221075 |      | -3.52893E-05 | 0.751350908 | -0.75406919  | 0.317982466 |
| H9     | -0.788194721 |      | -1.23747E-05 | 0.751365009 | -0.754083342 | 0.317989333 |
| O10    | -1.157990284 |      | -2.21804E-05 | 75.49179836 | -75.76491712 | 0.177328908 |

|       |             |              |             |              |             |
|-------|-------------|--------------|-------------|--------------|-------------|
| H11   | 0.583220462 | -2.88982E-05 | 0.356022613 | -0.357310653 | 0.159302083 |
| H12   | 0.566708392 | 1.41377E-05  | 0.380364067 | -0.381740171 | 0.165305525 |
| ----- |             |              |             |              |             |
| Total | -0.0004066  | -0.000192599 | 244.4861583 | -245.370675  |             |

**WT(BeH<sub>2</sub>)d** -----

| Atom A | q(A)         | L(A) | K(A)         | K_Scaled(A) | Mu_Intra(A)  |             |
|--------|--------------|------|--------------|-------------|--------------|-------------|
| O1     | -1.313461124 |      | -5.351E-05   | 75.63013433 | -75.90330281 | 0.069312589 |
| H2     | 0.654498368  |      | 6.48317E-05  | 0.317295241 | -0.31844128  | 0.100119726 |
| H3     | 0.606150435  |      | 1.08293E-05  | 0.356972473 | -0.358261822 | 0.14915892  |
| O4     | -1.189417186 |      | -5.79182E-06 | 75.5254021  | -75.7981923  | 0.190525174 |
| H5     | 0.617184053  |      | 4.27877E-05  | 0.350202139 | -0.351467034 | 0.12145765  |
| H6     | 0.579780703  |      | 4.7638E-05   | 0.360071491 | -0.361372033 | 0.163998193 |
| Be7    | 1.639095332  |      | -1.16054E-05 | 14.21475427 | -14.26609654 | 0.059943069 |
| H8     | -0.798743456 |      | 1.15123E-05  | 0.750341183 | -0.753051341 | 0.302330797 |
| H9     | -0.82035092  |      | 4.23462E-07  | 0.750244674 | -0.752954483 | 0.335719801 |
| O10    | -1.124011562 |      | -3.77611E-05 | 75.47264846 | -75.74524812 | 0.200282374 |
| H11    | 0.574803432  |      | 1.72159E-05  | 0.375707861 | -0.37706488  | 0.161563275 |
| H12    | 0.57455212   |      | 1.76529E-05  | 0.375854021 | -0.377211568 | 0.161799258 |
| -----  |              |      |              |             |              |             |
| Total  | 8.01959E-05  |      | 0.000104223  | 244.4796283 | -245.3626642 |             |

**WT(BeH<sub>2</sub>)a** -----

| Atom A | q(A)         | L(A) | K(A)         | K_Scaled(A) | Mu_Intra(A)  |             |
|--------|--------------|------|--------------|-------------|--------------|-------------|
| O1     | -1.31726067  |      | -7.79707E-05 | 75.6271126  | -75.90147491 | 0.040686655 |
| O2     | -1.173816469 |      | -1.87677E-05 | 75.51870596 | -75.79267498 | 0.201535061 |
| O3     | -1.183842408 |      | -2.95359E-05 | 75.50178565 | -75.7756933  | 0.18330293  |
| H4     | 0.65678255   |      | 5.16244E-05  | 0.316106193 | -0.317252972 | 0.091715877 |
| H5     | 0.635632481  |      | -9.92265E-05 | 0.334389874 | -0.335602984 | 0.112332604 |

|       |              |              |             |              |             |
|-------|--------------|--------------|-------------|--------------|-------------|
| H6    | 0.584676784  | -4.18484E-05 | 0.350593256 | -0.351865148 | 0.14806166  |
| H7    | 0.567043229  | 1.29272E-05  | 0.380009216 | -0.381387825 | 0.165848325 |
| H8    | 0.568572706  | 1.49693E-05  | 0.379383498 | -0.380759837 | 0.163782475 |
| H9    | 0.60812077   | 1.28231E-05  | 0.356127573 | -0.357419544 | 0.147771902 |
| Be10  | 1.641756423  | -4.24136E-05 | 14.21182232 | -14.26338039 | 0.056160065 |
| H11   | -0.770981254 | -7.79651E-06 | 0.757770052 | -0.760519113 | 0.323530877 |
| H12   | -0.816914086 | 6.79707E-07  | 0.751771952 | -0.754499253 | 0.335527406 |
| ----- |              |              |             |              |             |
| Total | -0.000229944 | -0.000224536 | 244.4855781 | -245.3725303 |             |

**WT(BeF<sub>2</sub>)b**

| Atom A | q(A)         | L(A)         | K(A)        | K_Scaled(A)  | Mu_Intra(A) |
|--------|--------------|--------------|-------------|--------------|-------------|
| O1     | -1.339980772 | -1.465E-05   | 75.6761808  | -75.91523781 | 0.072614852 |
| H2     | 0.657064226  | -4.74575E-05 | 0.318598679 | -0.319605115 | 0.111947639 |
| H3     | 0.657376805  | 1.20499E-05  | 0.318525594 | -0.319531799 | 0.112471042 |
| O4     | -1.162335879 | -2.58405E-05 | 75.49678127 | -75.73527157 | 0.185325684 |
| H5     | 0.569599739  | 1.54964E-05  | 0.379101747 | -0.380299309 | 0.163666919 |
| H6     | 0.618048191  | 1.99938E-05  | 0.348582696 | -0.34968385  | 0.129182058 |
| Be7    | 1.720755096  | 0.000738442  | 14.16436388 | -14.20910835 | 0.001934702 |
| F8     | -0.872142213 | -3.09016E-07 | 99.90405566 | -100.2196472 | 0.276681015 |
| F9     | -0.872176641 | -8.64666E-06 | 99.90437462 | -100.2199672 | 0.277450615 |
| O10    | -1.163099557 | -2.71156E-05 | 75.4964704  | -75.73495971 | 0.187176265 |
| H11    | 0.617922233  | 3.08156E-05  | 0.348732685 | -0.349834313 | 0.129272297 |
| H12    | 0.569447662  | 1.54718E-05  | 0.379168734 | -0.380366508 | 0.163930322 |
| -----  |              |              |             |              |             |
| Total  | 0.00047889   | 0.000708251  | 442.7349368 | -444.1335128 |             |

**WT(BeF<sub>2</sub>)c**

| Atom A | q(A)         | L(A)         | K(A)        | K_Scaled(A)  | Mu_Intra(A) |
|--------|--------------|--------------|-------------|--------------|-------------|
| O1     | -1.247000461 | -9.64753E-06 | 75.60460462 | -75.84455095 | 0.181788303 |

|       |              |              |             |              |             |
|-------|--------------|--------------|-------------|--------------|-------------|
| H2    | 0.642393775  | -3.71357E-06 | 0.327820268 | -0.328860671 | 0.112011355 |
| H3    | 0.599626695  | 1.80795E-05  | 0.360400316 | -0.361544118 | 0.151017487 |
| O4    | -1.171213441 | -3.09015E-05 | 75.50297426 | -75.74259805 | 0.186720099 |
| H5    | 0.564693037  | 1.50936E-05  | 0.38175447  | -0.382966044 | 0.16615663  |
| H6    | 0.627838621  | -2.8087E-05  | 0.342617548 | -0.343704914 | 0.12053291  |
| Be7   | 1.72519135   | -3.85342E-05 | 14.12654024 | -14.17137364 | 0.002624879 |
| O8    | -1.179364923 | -3.60432E-06 | 75.5663329  | -75.80615777 | 0.196401156 |
| H9    | 0.604365384  | 2.03773E-05  | 0.357249909 | -0.358383713 | 0.14864296  |
| H10   | 0.607585209  | 2.07617E-05  | 0.354926684 | -0.356053115 | 0.147816451 |
| F11   | -0.892814815 | -1.55423E-05 | 99.89869777 | -100.2157463 | 0.237868459 |
| F12   | -0.881367847 | -8.51471E-06 | 99.90255998 | -100.2196207 | 0.200888438 |
| ----- |              |              |             |              |             |
| Total | -6.74154E-05 | -6.42331E-05 | 442.726479  | -444.13156   |             |

**WT(BeF<sub>2</sub>)d**

| Atom A | q(A)         | L(A) | K(A)         | K_Scaled(A) | Mu_Intra(A)  |             |
|--------|--------------|------|--------------|-------------|--------------|-------------|
| O1     | -1.293606198 |      | -9.52864E-05 | 75.63120656 | -75.86897562 | 0.092748465 |
| H2     | 0.65666266   |      | 5.58446E-05  | 0.314510631 | -0.315499388 | 0.095023646 |
| H3     | 0.61105024   |      | 8.65647E-06  | 0.353947308 | -0.355060046 | 0.146339924 |
| O4     | -1.194116984 |      | -5.63555E-06 | 75.5337708  | -75.77123354 | 0.196791945 |
| H5     | 0.619589657  |      | -2.85513E-05 | 0.348694746 | -0.349790971 | 0.120420587 |
| H6     | 0.611533608  |      | -1.75884E-05 | 0.3524415   | -0.353549504 | 0.13435167  |
| Be7    | 1.718476179  |      | -1.28013E-05 | 14.16824368 | -14.21278575 | 0.002370382 |
| O8     | -1.124530073 |      | -3.6367E-05  | 75.47315489 | -75.71042707 | 0.200990663 |
| H9     | 0.575605177  |      | 1.39411E-05  | 0.375263092 | -0.376442843 | 0.161118905 |
| H10    | 0.575365299  |      | 1.77966E-05  | 0.375383703 | -0.376563833 | 0.161388573 |
| F11    | -0.877036517 |      | 8.91861E-06  | 99.90257218 | -100.2166455 | 0.265899665 |
| F12    | -0.879065681 |      | -1.07033E-05 | 99.90232619 | -100.2163987 | 0.317726296 |

Total -7.26332E-05 -0.000101776 442.7315153 -444.1233727

**WT(BeF<sub>2</sub>)a**

| Atom  | A | q(A)         | L(A) | K(A)         | K_Scaled(A) | Mu_Intra(A)  |             |
|-------|---|--------------|------|--------------|-------------|--------------|-------------|
| O1    |   | -1.178694696 |      | -4.96803E-05 | 75.50602936 | -75.74428772 | 0.193319654 |
| O2    |   | -1.298427184 |      | 3.66944E-05  | 75.63195786 | -75.8706136  | 0.041642306 |
| O3    |   | -1.179459635 |      | -4.21451E-05 | 75.52218662 | -75.76049597 | 0.194834507 |
| H4    |   | 0.635883289  |      | -0.000114125 | 0.339569312 | -0.340640819 | 0.111590585 |
| H5    |   | 0.660885632  |      | 5.04574E-05  | 0.312156406 | -0.313141412 | 0.087908619 |
| H6    |   | 0.635426496  |      | 8.57304E-05  | 0.333570659 | -0.334623237 | 0.108775927 |
| H7    |   | 0.57147524   |      | 1.55337E-05  | 0.377580879 | -0.378772331 | 0.16245996  |
| H8    |   | 0.612697642  |      | 9.89965E-06  | 0.352914378 | -0.354027995 | 0.145250196 |
| H9    |   | 0.567604042  |      | 1.59886E-05  | 0.38017723  | -0.381376874 | 0.164622545 |
| Be10  |   | 1.72093422   |      | 5.29441E-06  | 14.16453238 | -14.2092284  | 0.001787798 |
| F11   |   | -0.870392551 |      | 4.64649E-06  | 99.91234523 | -100.2276174 | 0.260415316 |
| F12   |   | -0.877761722 |      | -9.87396E-06 | 99.90410818 | -100.2193544 | 0.3156862   |
| Total |   | 0.000170772  |      | 8.42052E-06  | 442.7371285 | -444.1341802 |             |
